# Supplementary material for: Feature Selection Stability and Accuracy of Prediction Models for Genomic Prediction of Residual Feed Intake in Pigs Using Machine Learning
Source: PubMed Central journal article supplement (PMC7938892; doi:10.3389/fgene.2021.611506), 2021-02-22
Supplement: Data_Sheet_1.pdf [file Data_Sheet_1.pdf]

# SUPPLEMENTARY MATERIAL

**Supplementary Table 1.** Stability of feature selection methods for prediction of average daily gain with Elastic Net

| Subset size <sup>1</sup> | Filter <sup>2</sup> | NSNPs <sup>3</sup> | PDF <sup>4</sup> | medianSel <sup>5</sup> | IQRSel <sup>6</sup> | NOG <sup>7</sup> |
|--------------------------|---------------------|--------------------|------------------|------------------------|---------------------|------------------|
| 50                       | mrmr                | 500                | 0.33             | 50                     | 0                   | 0.46             |
|                          | cforest             | 464                | 0.88             | 46                     | 5                   | 0.03             |
|                          | spearcor            | 429                | 0.27             | 43                     | 2                   | 0.55             |
|                          | univ.dtree          | 247                | 0.98             | 25                     | 14                  | 0.00             |
|                          | random              | 188                | 0.99             | 21                     | 3                   | 0.00             |
| 250                      | mrmr                | 1953               | 0.29             | 196                    | 3                   | 0.51             |
|                          | cforest             | 1633               | 0.74             | 178                    | 57                  | 0.06             |
|                          | spearcor            | 1635               | 0.28             | 164                    | 7                   | 0.53             |
|                          | univ.dtree          | 901                | 0.90             | 93                     | 10                  | 0.01             |
|                          | random              | 876                | 0.92             | 92                     | 9                   | 0.01             |
| 500                      | mrmr                | 3339               | 0.27             | 336                    | 11                  | 0.54             |
|                          | cforest             | 2037               | 0.65             | 206                    | 8                   | 0.10             |
|                          | spearcor            | 2685               | 0.28             | 279                    | 18                  | 0.53             |
|                          | univ.dtree          | 1546               | 0.84             | 163                    | 18                  | 0.03             |
|                          | random              | 1399               | 0.86             | 156                    | 45                  | 0.02             |
| 750                      | mrmr                | 3588               | 0.27             | 344                    | 15                  | 0.56             |
|                          | cforest             | 2493               | 0.61             | 256                    | 19                  | 0.12             |
|                          | spearcor            | 2883               | 0.27             | 281                    | 22                  | 0.56             |
|                          | univ.dtree          | 1849               | 0.78             | 193                    | 42                  | 0.04             |
|                          | random              | 1872               | 0.81             | 202                    | 47                  | 0.03             |
| 1000                     | mrmr                | 3865               | 0.25             | 386                    | 11                  | 0.58             |
|                          | cforest             | 2902               | 0.58             | 288                    | 19                  | 0.13             |
|                          | spearcor            | 3269               | 0.25             | 332                    | 24                  | 0.59             |
|                          | univ.dtree          | 2106               | 0.74             | 196                    | 55                  | 0.05             |
|                          | random              | 2334               | 0.76             | 251                    | 16                  | 0.04             |
| 1500                     | mrmr                | 4559               | 0.25             | 454                    | 13                  | 0.59             |
|                          | cforest             | 3480               | 0.53             | 354                    | 30                  | 0.16             |
|                          | spearcor            | 3986               | 0.25             | 393                    | 27                  | 0.59             |
|                          | univ.dtree          | 2406               | 0.68             | 246                    | 71                  | 0.07             |
|                          | random              | 2545               | 0.69             | 297                    | 89                  | 0.06             |
| 9523                     | none                | 3764               | 0.25             | 363                    | 16                  | 0.59             |

<sup>1</sup>Subset size = number of selected features

<sup>2</sup>Filter method = Maximum relevance minimum redundancy (mrmr); Random forest (cforest); Spearman's correlation (spearcor); Univariate decision tree (univ.dtree); Random selection (random)

<sup>3</sup>NSNPs = Total number of SNPs pre-selected in the 10 subsets

<sup>4</sup>PDF = Proportion of distinct features in the 10 subsets

<sup>5</sup>medianSel = Mean number of selected SNPs in the 10 subsets

<sup>6</sup>IQRSel = Interquartile range of the number of selected SNPs in the 10 subsets

<sup>7</sup>NOG = Noguera et al. (2018) stability estimator

**Supplementary Table 2.** Stability of feature selection methods for prediction of average daily gain with LASSO regression

| Subset size <sup>1</sup> | Filter <sup>2</sup> | NSNPs <sup>3</sup> | PDF <sup>4</sup> | medianSel <sup>5</sup> | IQRSel <sup>6</sup> | NOG <sup>7</sup> |
|--------------------------|---------------------|--------------------|------------------|------------------------|---------------------|------------------|
| 50                       | mrmr                | 500                | 0.33             | 50                     | 0                   | 0.46             |
|                          | cforest             | 473                | 0.88             | 48                     | 2                   | 0.03             |
|                          | spearcor            | 433                | 0.27             | 43                     | 3                   | 0.55             |
|                          | univ.dtree          | 281                | 0.99             | 33                     | 7                   | 0.00             |
|                          | random              | 209                | 1.00             | 26                     | 5                   | 0.00             |
| 250                      | mrmr                | 1922               | 0.29             | 194                    | 6                   | 0.51             |
|                          | cforest             | 1664               | 0.74             | 169                    | 20                  | 0.06             |
|                          | spearcor            | 1576               | 0.28             | 159                    | 3                   | 0.53             |
|                          | univ.dtree          | 985                | 0.91             | 102                    | 30                  | 0.01             |
|                          | random              | 1066               | 0.92             | 119                    | 18                  | 0.01             |
| 500                      | mrmr                | 2911               | 0.27             | 292                    | 5                   | 0.55             |
|                          | cforest             | 2451               | 0.68             | 249                    | 16                  | 0.08             |
|                          | spearcor            | 2464               | 0.28             | 244                    | 15                  | 0.54             |
|                          | univ.dtree          | 1683               | 0.84             | 175                    | 70                  | 0.03             |
|                          | random              | 1583               | 0.86             | 147                    | 37                  | 0.02             |
| 750                      | mrmr                | 3720               | 0.26             | 377                    | 28                  | 0.57             |
|                          | cforest             | 2838               | 0.64             | 300                    | 54                  | 0.10             |
|                          | spearcor            | 3064               | 0.27             | 308                    | 20                  | 0.55             |
|                          | univ.dtree          | 1963               | 0.79             | 193                    | 42                  | 0.04             |
|                          | random              | 2103               | 0.81             | 227                    | 53                  | 0.03             |
| 1000                     | mrmr                | 4241               | 0.26             | 435                    | 41                  | 0.56             |
|                          | cforest             | 3223               | 0.61             | 322                    | 54                  | 0.12             |
|                          | spearcor            | 3489               | 0.27             | 350                    | 22                  | 0.56             |
|                          | univ.dtree          | 2156               | 0.74             | 223                    | 23                  | 0.05             |
|                          | random              | 2195               | 0.76             | 227                    | 18                  | 0.04             |
| 1500                     | mrmr                | 5207               | 0.25             | 508                    | 49                  | 0.57             |
|                          | cforest             | 3577               | 0.54             | 373                    | 59                  | 0.15             |
|                          | spearcor            | 4375               | 0.26             | 439                    | 20                  | 0.56             |
|                          | univ.dtree          | 2676               | 0.68             | 284                    | 21                  | 0.07             |
|                          | random              | 2807               | 0.69             | 287                    | 73                  | 0.06             |
| 9523                     | none                | 4696               | 0.25             | 461                    | 30                  | 0.57             |

<sup>1</sup>Subset size = number of selected features

<sup>2</sup>Filter method = Maximum relevance minimum redundancy (mrmr); Random forest (cforest); Spearman's correlation (spearcor); Univariate decision tree (univ.dtree); Random selection (random)

<sup>3</sup>NSNPs = Total number of SNPs pre-selected in the 10 subsets

<sup>4</sup>PDF = Proportion of distinct features in the 10 subsets

<sup>5</sup>medianSel = Mean number of selected SNPs in the 10 subsets

<sup>6</sup>IQRSel = Interquartile range of the number of selected SNPs in the 10 subsets

<sup>7</sup>NOG = Nogueria et al. (2018) stability estimator

**Supplementary Table 3.** Stability of filter methods for prediction of average daily gain

| Subset size <sup>1</sup> | Filter method <sup>2</sup> | NSNPs <sup>3</sup> | PDF <sup>4</sup> | NOG <sup>5</sup> |
|--------------------------|----------------------------|--------------------|------------------|------------------|
| 50                       | mrmr                       | 500                | 0.33             | 0.46             |
|                          | cforest                    | 500                | 0.88             | 0.03             |
|                          | spearcor                   | 500                | 0.25             | 0.61             |
|                          | univ.dtree                 | 500                | 0.97             | 0.00             |
|                          | random                     | 500                | 0.98             | 0.00             |
| 250                      | mrmr                       | 2500               | 0.25             | 0.58             |
|                          | cforest                    | 2500               | 0.75             | 0.05             |
|                          | spearcor                   | 2500               | 0.21             | 0.67             |
|                          | univ.dtree                 | 2500               | 0.87             | 0.00             |
|                          | random                     | 2500               | 0.88             | 0.00             |
| 500                      | mrmr                       | 5000               | 0.22             | 0.65             |
|                          | cforest                    | 5000               | 0.69             | 0.05             |
|                          | spearcor                   | 5000               | 0.19             | 0.70             |
|                          | univ.dtree                 | 5000               | 0.77             | 0.01             |
|                          | random                     | 5000               | 0.79             | 0.00             |
| 750                      | mrmr                       | 7500               | 0.20             | 0.68             |
|                          | cforest                    | 7500               | 0.63             | 0.05             |
|                          | spearcor                   | 7500               | 0.18             | 0.73             |
|                          | univ.dtree                 | 7500               | 0.70             | 0.01             |
|                          | random                     | 7500               | 0.71             | 0.00             |
| 1000                     | mrmr                       | 10000              | 0.19             | 0.70             |
|                          | cforest                    | 10000              | 0.57             | 0.05             |
|                          | spearcor                   | 10000              | 0.18             | 0.74             |
|                          | univ.dtree                 | 10000              | 0.62             | 0.01             |
|                          | random                     | 10000              | 0.64             | 0.00             |
| 1500                     | mrmr                       | 15000              | 0.18             | 0.72             |
|                          | cforest                    | 15000              | 0.48             | 0.05             |
|                          | spearcor                   | 15000              | 0.17             | 0.74             |
|                          | univ.dtree                 | 15000              | 0.51             | 0.02             |
|                          | random                     | 15000              | 0.52             | 0.00             |

<sup>1</sup>Subset size = number of selected features

<sup>2</sup>Filter method = Maximum relevance minimum redundancy (mrmr); Random forest (cforest); Spearman's correlation (spearcor); Univariate decision tree (univ.dtree); Random selection (random)

<sup>3</sup>NSNPs = Total number of SNPs selected in the 10 subsets

<sup>4</sup>PDF = Proportion of distinct features in the 10 subsets

<sup>5</sup>NOG = Noguera et al. (2018) stability estimator

**Supplementary Table 4.** Mean of the Pearson and Spearman correlation over all pairs of feature scores in the 10-outer training sets obtained with different filter methods for feature selection for prediction of average daily gain

| Filter method <sup>1</sup> | Pearson | Spearman |
|----------------------------|---------|----------|
| mrmr                       | 0.888   | 0.907    |
| cforest                    | 0.039   | 0.024    |
| spearcor                   | 0.897   | 0.852    |
| univ.dtree                 | 0.032   | 0.030    |
| random                     | 0.001   | 0.001    |

<sup>1</sup>Filter method = Maximum relevance minimum redundancy (mrmr); Random forest (cforest); Spearman's correlation (spearcor); Univariate decision tree (univ.dtree); Random selection (random)

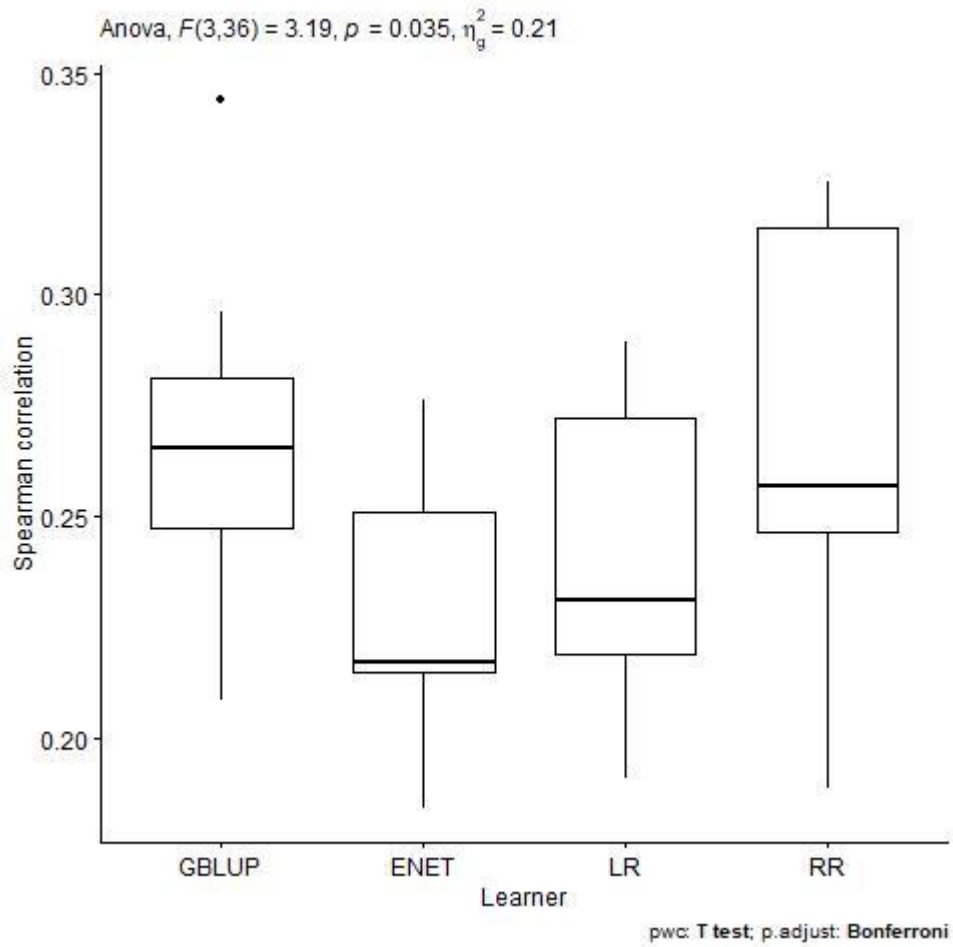

**Supplementary Figure 1.** Boxplots for the Spearman correlation for average daily gain obtained in 10-outer testing sets with a Genomic Best linear Unbiased Predictor (GBLUP), Elastic Net (ENET), Least Absolute Shrinkage and Selection Operator Regression (LR), and Ridge Regression (RR) with no feature selection method used to select the SNPs

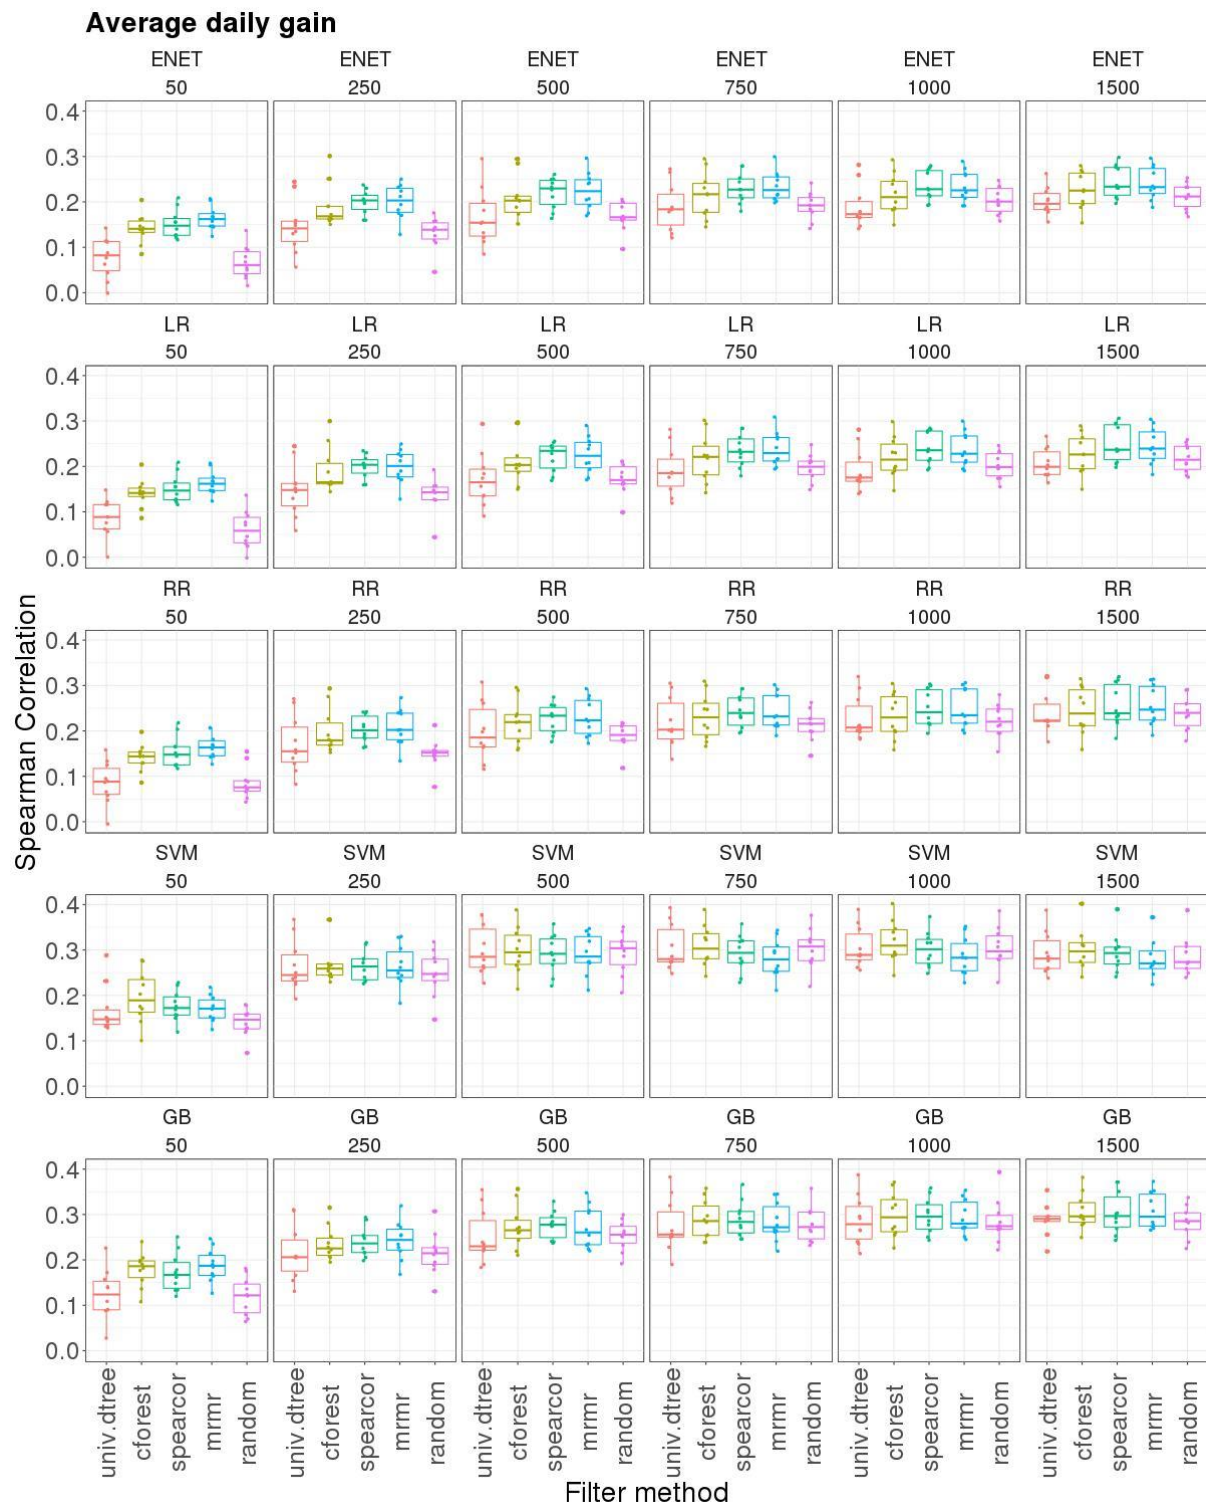

**Supplementary Figure 2.** Boxplots for the Spearman correlation for average daily gain obtained in 10-outer testing sets with Support Vector Machine for regression (SVM), Gradient Boosting (GB), Elastic Net (ENET), Least Absolute Shrinkage and Selection Operator Regression (LR), and Ridge Regression (RR) with 50, 250, 500, 750, 1,000 and 1,500 SNP subsets selected with different filter methods. Filter methods: Maximum relevance minimum redundancy (mrmr), Random forest (cforest), Spearman's correlation (spearcor), Univariate decision tree (univ.dtree) and random selection (random)

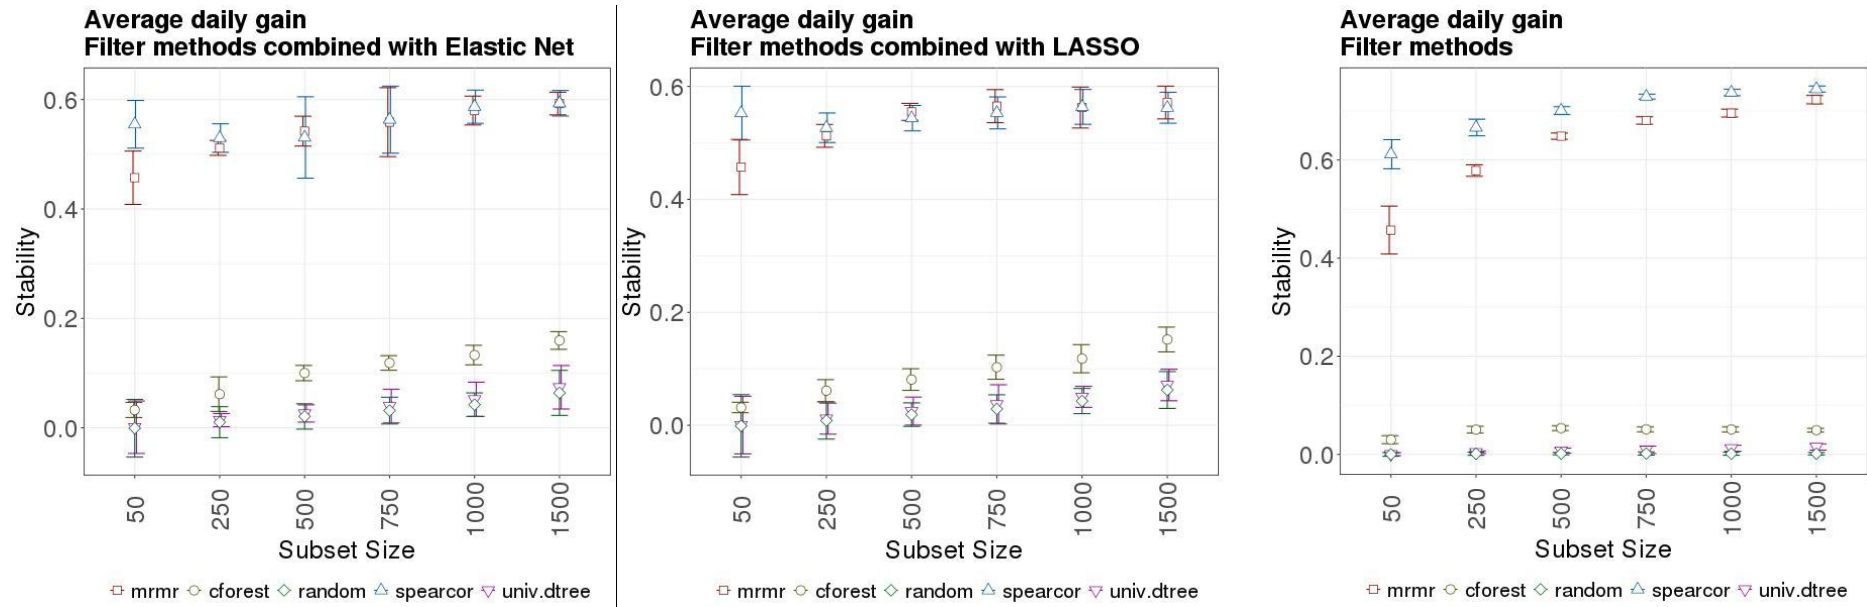

**Supplementary Figure 3.** Left and middle panels: Boxplots for Nogueira et al. (2018) stability estimator obtained for average daily gain from embedded methods implemented with different SNP subsets sizes and several filter methods in 10 outer-training folds. Right panel: Boxplots for Nogueira et al. (2018) stability estimator of different SNP subset sizes obtained with different filter methods in the 10-outer training folds. Subsets sizes: 50, 250, 500, 750, 1,000 and 1,500 SNPs. Filter methods: Maximum relevance minimum redundancy (mrmr), Random forest (cforest), Spearman’s correlation (spearcor), Univariate decision tree (univ.dtree) and random selection (random)
